# Supplementary material for: Modeling the impact of COVID-19 on Retina Clinic Performance
Source: Springer Nature journal article supplement (doi:10.1186/s12886-021-01955-x), 2021-05-10
Supplement: MOESM1 [file 19150972]

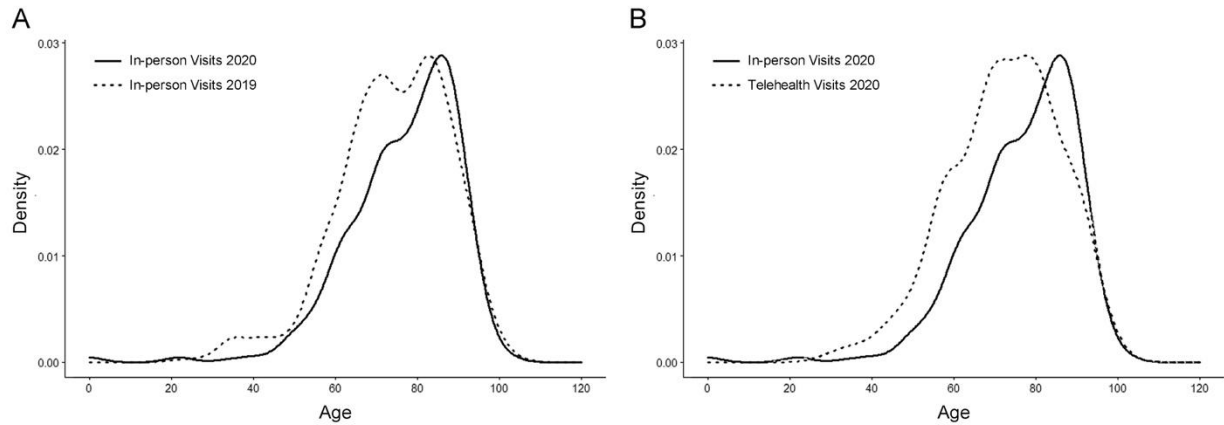

**Supplemental Figure 1.** Density plot of the age distribution of retina patients. (A) Patients seen in-person in the retina clinic in 2020 were older compared with those seen in-person in 2019. (B) In contrast, retina patients treated by telehealth in 2020 were younger than those patients seen in clinic during the same period in 2020.
